# Supplementary material for: PacBio Full-Length Transcriptome Sequencing Reveals the Mechanism of Salt Stress Response in Sonneratia apetala
Source: MDPI journal article supplement (doi:10.3390/plants12223849), 2023-11-14
Supplement: s1 [file s1]

## ***Supplementary Material***

**The following Supporting Information is available for this article:**

**Supplementary Figure S1.** Base quality analysis of clean reads for sequencing library of LCK\_a (a), LCK\_b (b), LCK\_c (c), LT1\_a (d), LT1\_b (e), LT1\_c (f), LT2\_a (g), LT2\_b (h) and LT2\_c (i). LCK, control; LT1, salinity treatments for 1 d; LT2, salinity treatments for 28 d. a, b, c represent the three repetitions.

**Supplementary Figure S2.** Pearson correlation analysis between samples based on gene expression profiles. LCK, control; LT1, salinity treatments for 1 d; LT2, salinity treatments for 28 d. a, b, c represent the three repetitions.

**Supplementary Table S1.** The primer sequences used for quantitative real-time PCR (qRT-PCR) analysis.

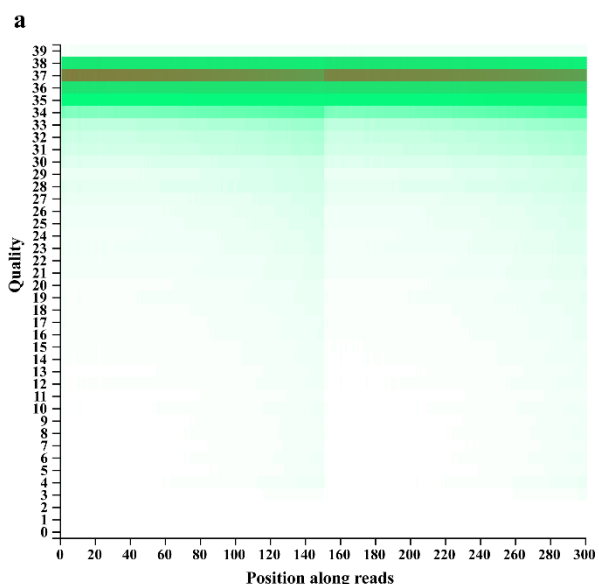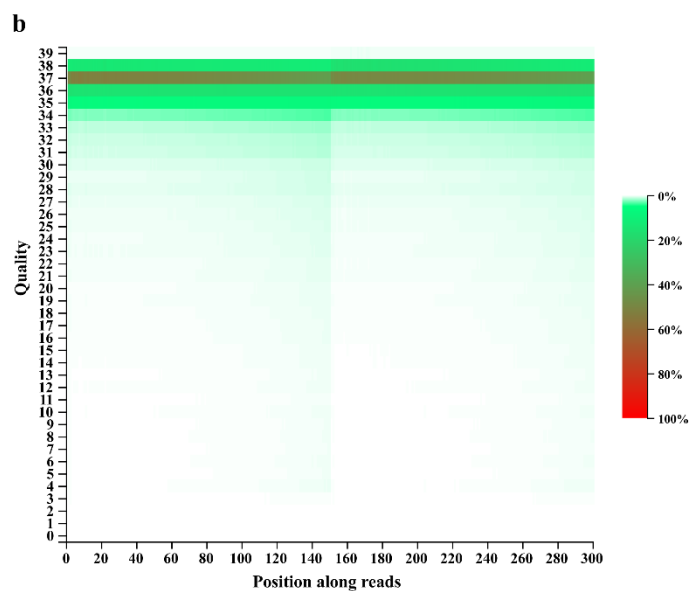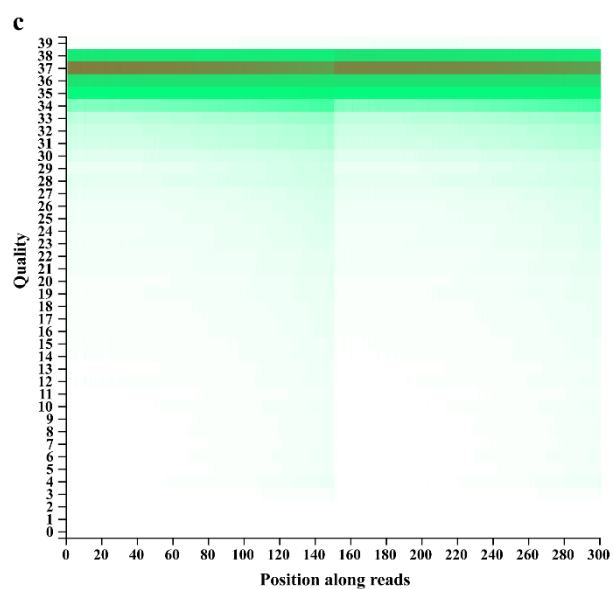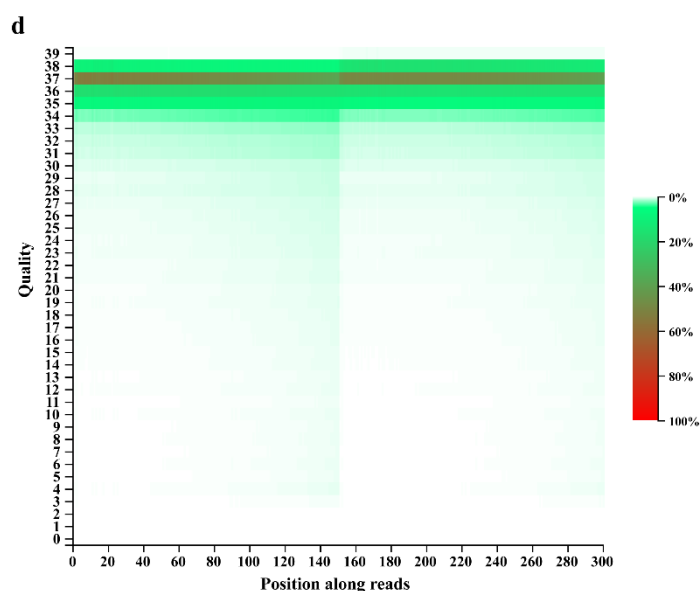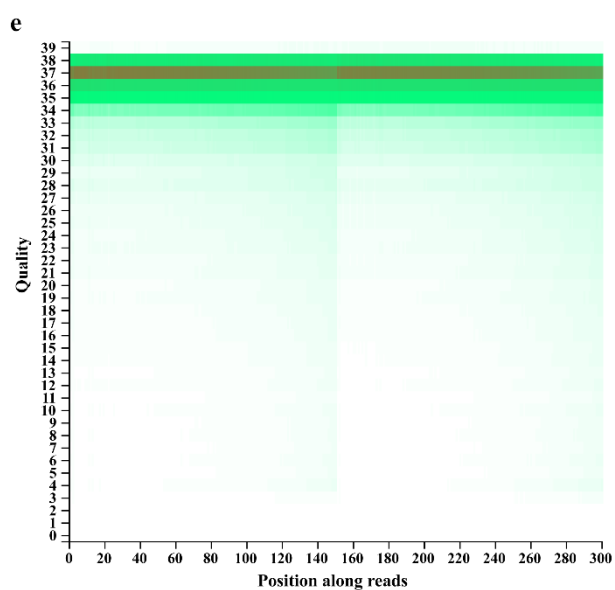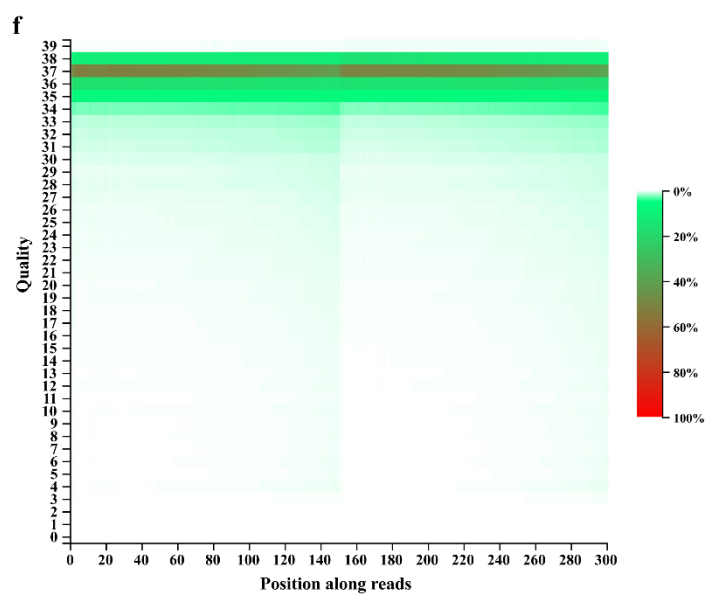

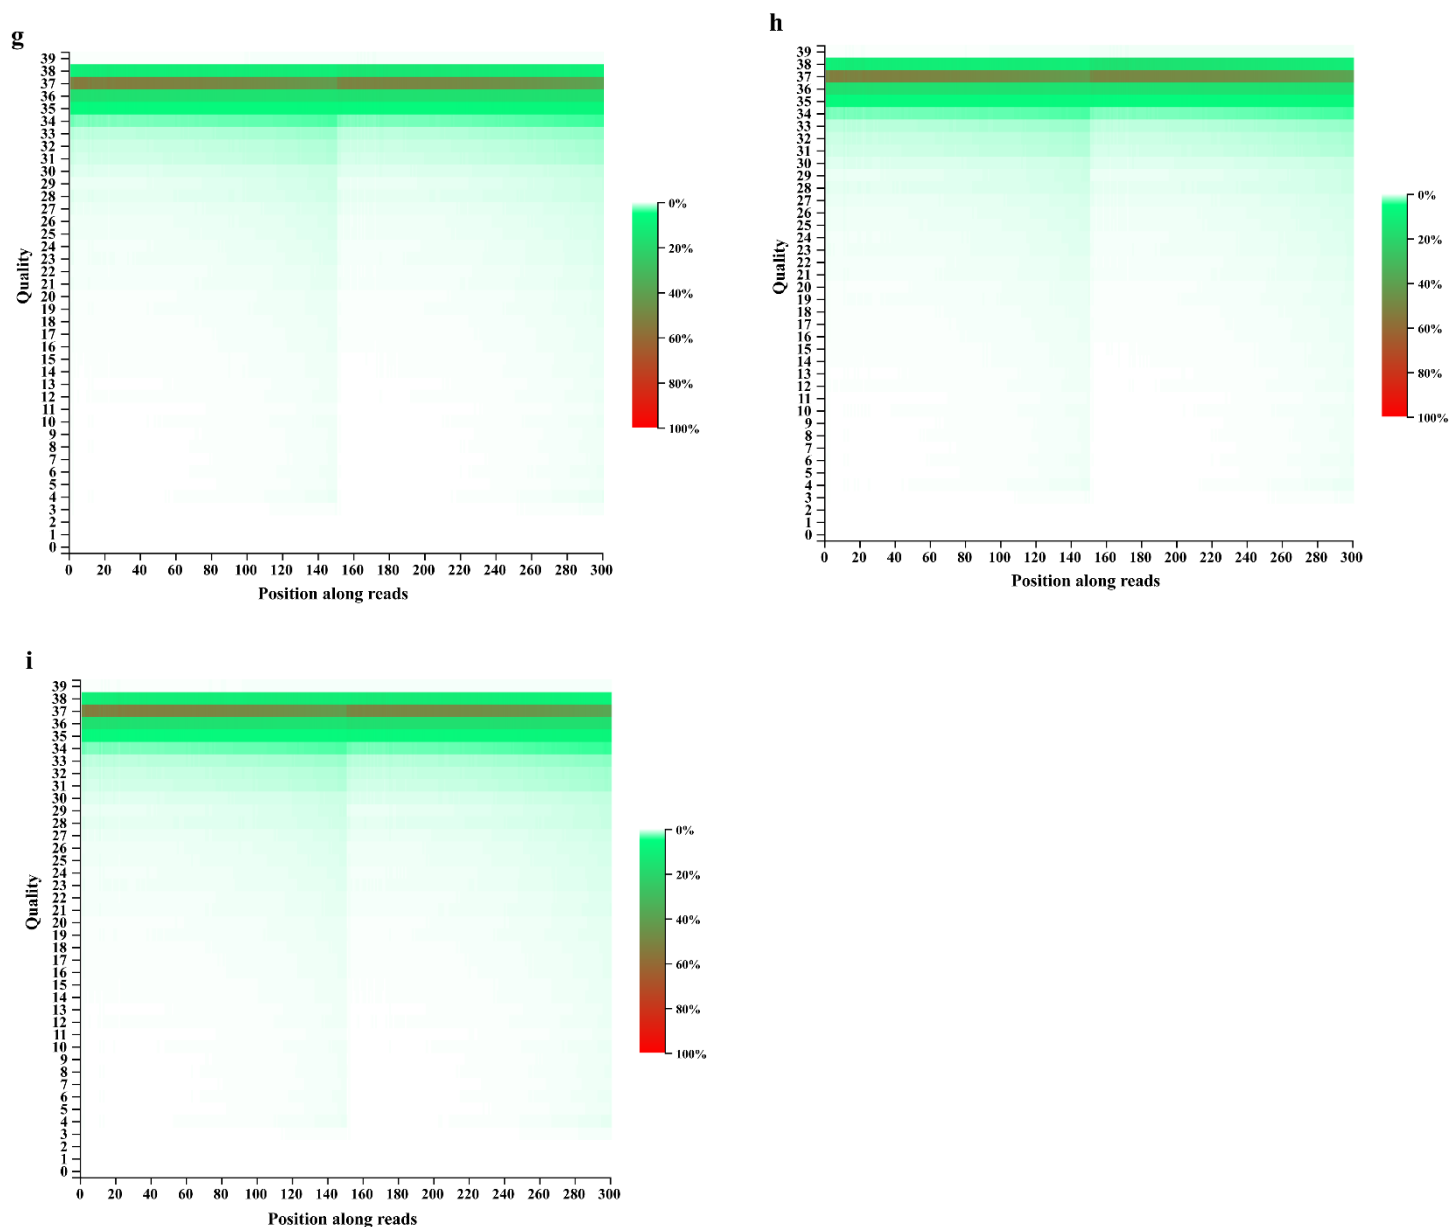

**Figure S1.** Base quality analysis of clean reads for sequencing library of LCK\_a (a), LCK\_b (b), LCK\_c (c), LT1\_a (d), LT1\_b (e), LT1\_c (f), LT2\_a (g), LT2\_b (h) and LT2\_c (i). LCK, control; LT1, salinity treatments for 1 d; LT2, salinity treatments for 28 d. a, b, c represent the three repetitions.

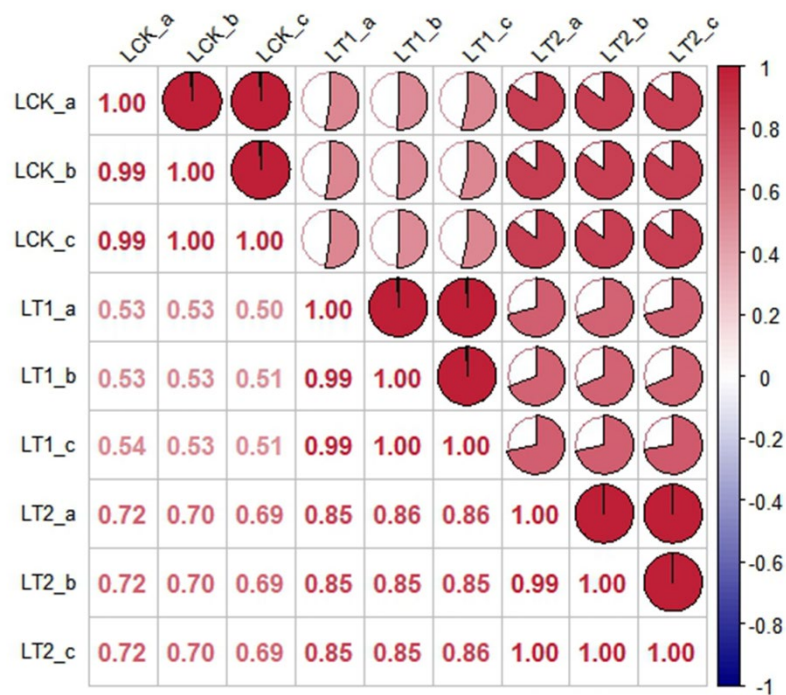

**Figure S2.** Pearson correlation analysis between samples based on gene expression profiles. LCK, control; LT1, salinity treatments for 1 d; LT2, salinity treatments for 28 d. a, b, c represent the three repetitions.

**Table S1.** The primer sequences used for quantitative real-time PCR (qRT-PCR) analysis.

| Gene ID        | Forward primer (5' →3' ) | Reverse primer (5' →3' ) |
|----------------|--------------------------|--------------------------|
| isoform_290716 | AGCTAGATAACAAGAATGAT     | TTATCATTCTTGTTATCTAGC    |
| isoform_82715  | CGGTGCTCCTCCTCCTTCTG     | GAGGCCATCAAAGGCAGAGG     |
| isoform_22449  | ACCTATCTATCAGGAGGAATC    | CTTCCGAGTCTCTTCCGTCA     |
| isoform_49093  | ATTCGCCGAGAAACCGTTCCA    | ATTCGCCGAGAAACCGTTCCAC   |
| isoform_158609 | TAAGCAGTGGTATCAACGCA     | CTCTGCGTTGATACCACTGCTTA  |
| isoform_37195  | ATGCTTTCCGTTTGGA         | AGAGGCGAAGTGCCAAACGGA    |
| 18s rRNA       | CCGCCTCTGGTGTGCACCGGC    | CCCCCGGAACCCAAGGACT      |
